# Supplementary material for: Acute thiamethoxam toxicity in honeybees is not enhanced by common fungicide and herbicide and lacks stress-induced changes in mRNA splicing
Source: PubMed Central journal article supplement (PMC6915785; doi:10.1038/s41598-019-55534-8), 2019-12-16

## Supplementary Figures:

Supplementary Figs 1 and 2, and pictures of uncropped gels

### Acute Thiamethoxam toxicity in honeybees is not enhanced by common fungicide and herbicide and lacks stress-induced changes in mRNA splicing

Pâmela Decio<sup>1\*</sup>, Pinar Ustaoglu<sup>2\*</sup> †, Thaisa C. Roat<sup>1</sup>, Osmar Malaspina<sup>1</sup>, Jean-Marc Devaud<sup>3</sup>, Reinhard Stöger<sup>4, 5</sup> and Matthias Soller<sup>2, 5</sup>

<sup>1</sup>Universidade Estadual Paulista (UNESP), Instituto de Biociências, Centro de Estudos de Insetos Sociais, Rio Claro, São Paulo, Brazil.

<sup>2</sup>School of Biosciences, College of Life and Environmental Sciences, University of Birmingham, Edgbaston, Birmingham, B15 2TT, United Kingdom

<sup>3</sup>Research Center on Animal Cognition, Center for Integrative Biology, Toulouse University, CNRS, UPS, Toulouse, France.

<sup>4</sup>School of Biosciences, University of Nottingham, LE12 5RD, United Kingdom

**Running title:** Neonicotinoid toxicity is not enhanced by common fungicide and herbicide

**Key Words:** Neonicotinoid, carbendazim, glyphosate, *Apis mellifera*, alternative splicing, *Dscam*, ELAV, RNA binding proteins

<sup>5</sup>Corresponding authors: [m.soller@bham.ac.uk](mailto:m.soller@bham.ac.uk), [reinhard.stoger@nottingham.ac.uk](mailto:reinhard.stoger@nottingham.ac.uk)

\* equal contributing authors

Present address: † MRC Centre for Molecular Bacteriology and Infection, and Department of Life Sciences, Imperial College London, Ground Floor, Flowers Building, South Kensington Campus, London SW7 2AZ, UK

**Suppl  
Figure 1**

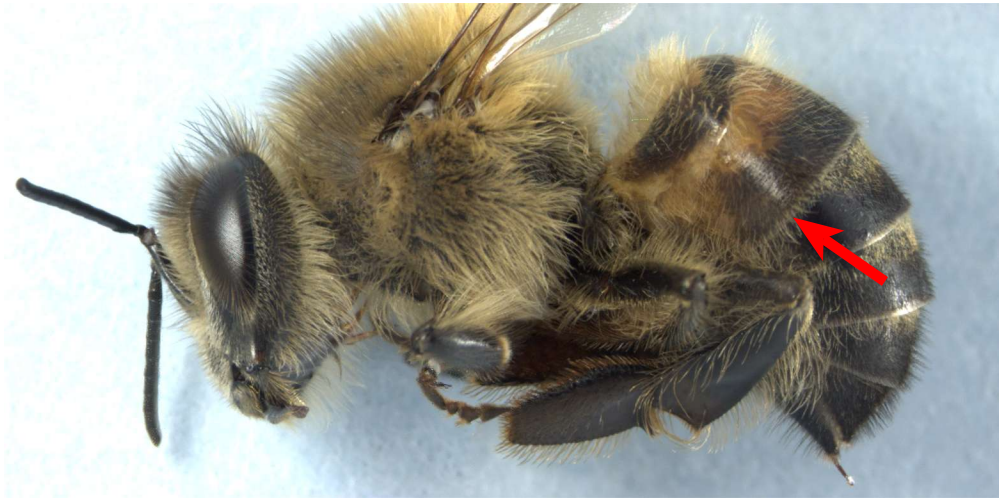

**Supplemental Figure 1: Picture of a honey bee. The red arrow points towards the site of injection.**

**Suppl  
Figure 2**

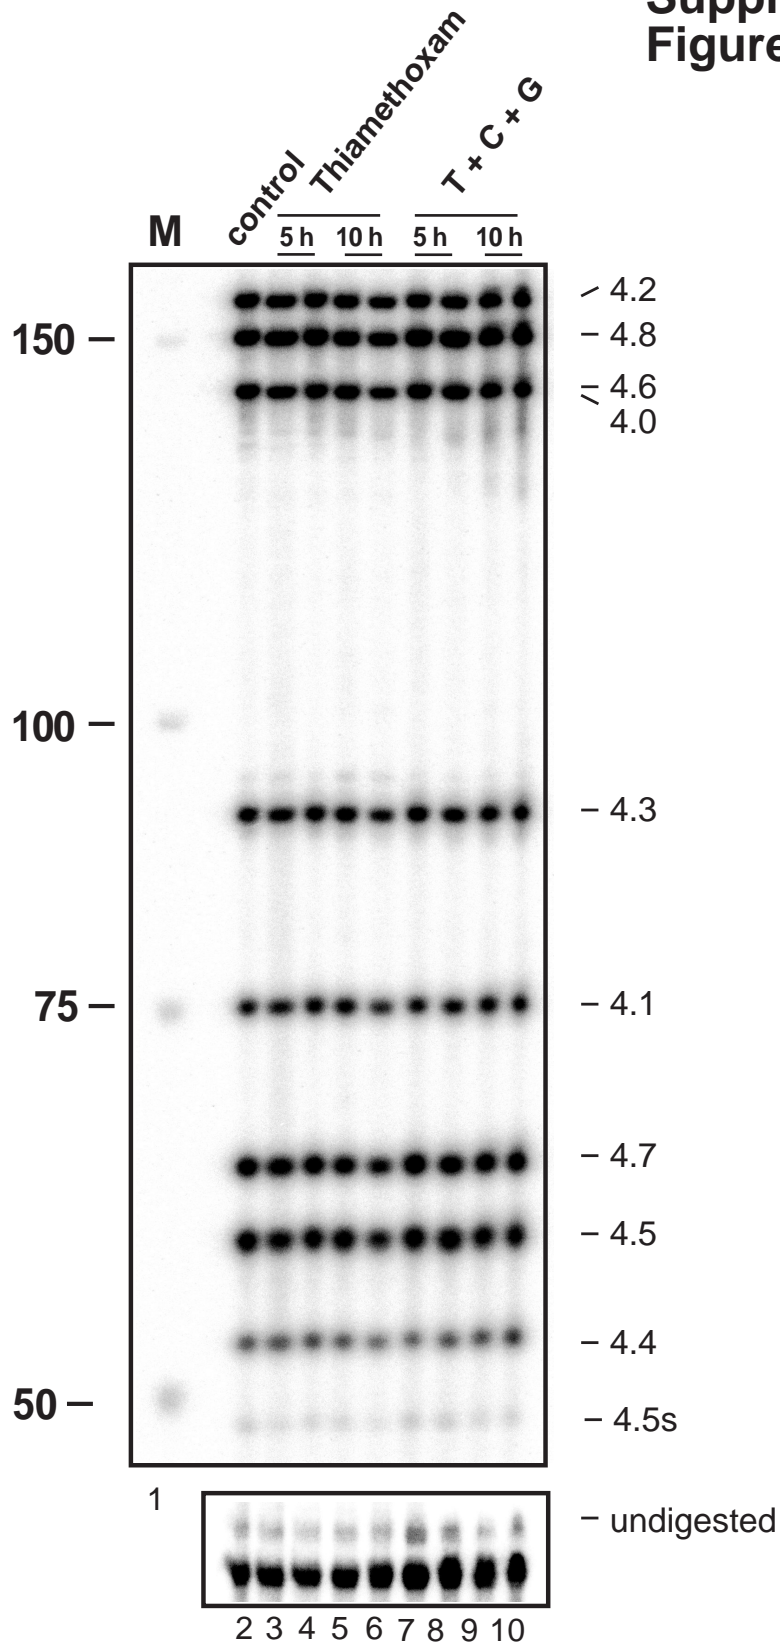

**Supplemental Figure 2: Denaturing polyacrylamide gel showing the splicing pattern of Dscam exon 4 isoform variables after digestion with restriction enzymes 5 h and 10 h after injection of Thiamethoxam (1  $\mu$ M) or the combination of Thiamethoxam, Carbendazim and Glyphosate (T+C+G, 1  $\mu$ M/2 mM/47 mM). The undigested PCR is shown at the bottom. Ma: DNA marker**

**Fig 2 C**

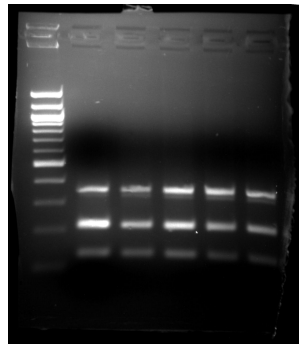

**Fig 2 D gel used for quantification**

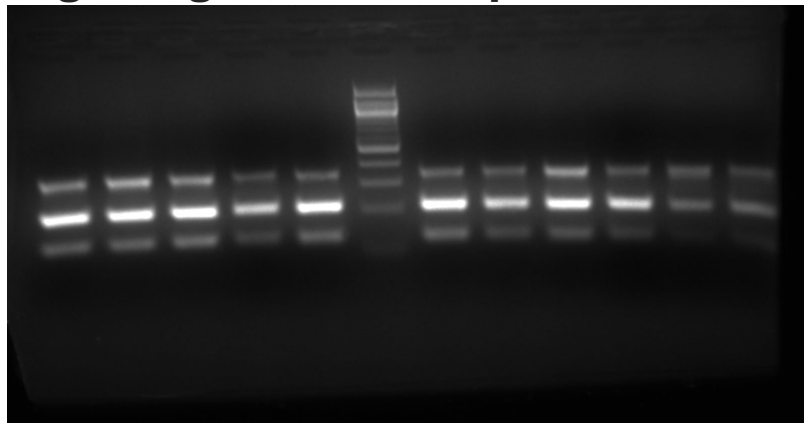

**Fig 2 E**

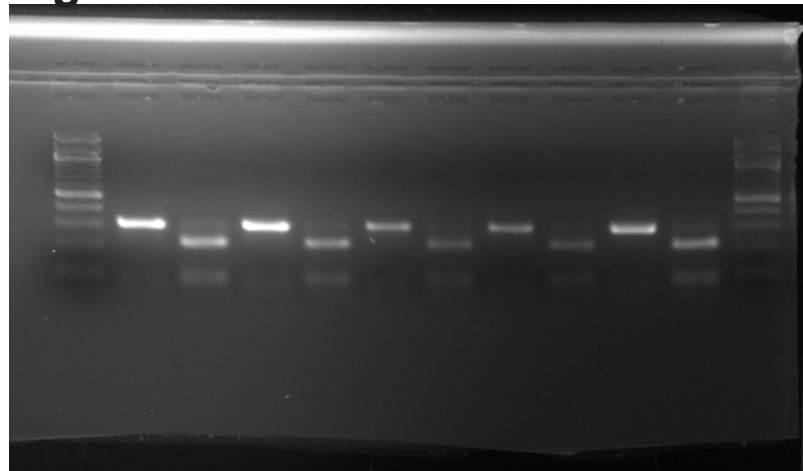

gel in Fig 3

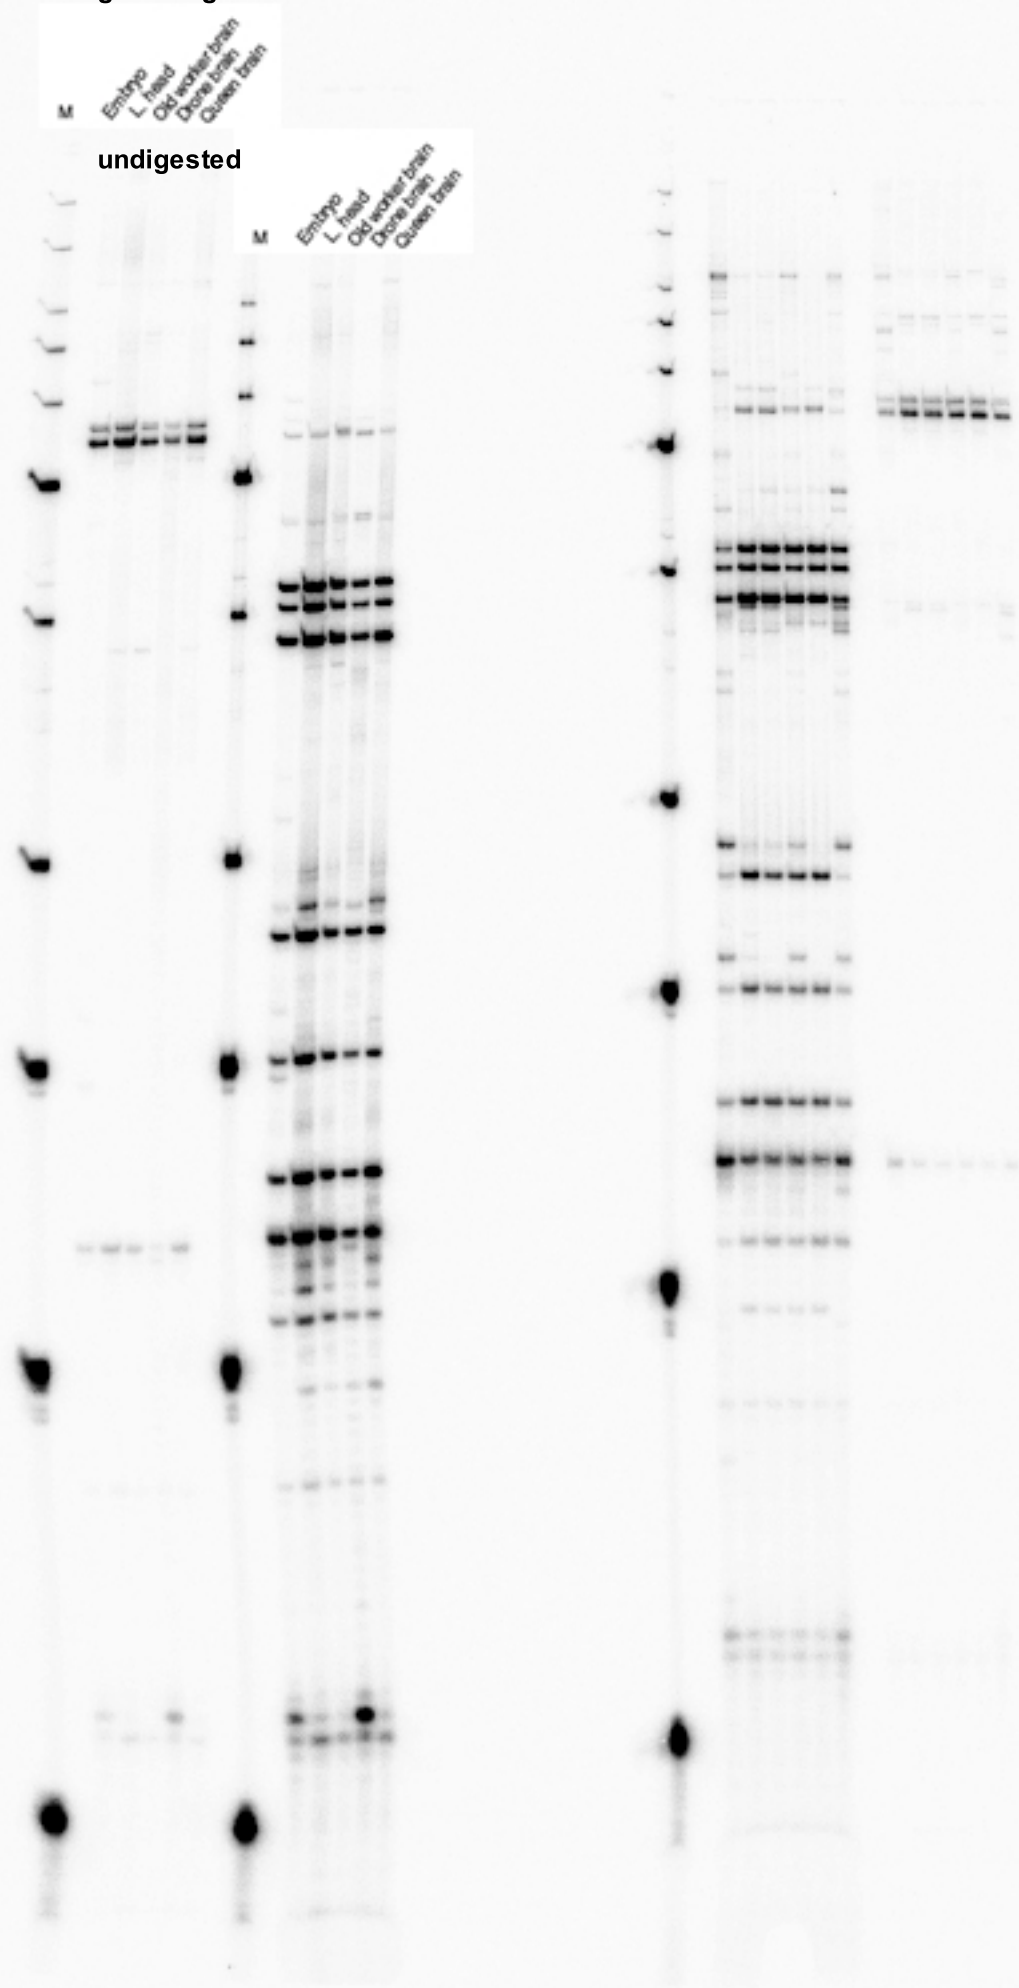

M Embryo  
L head  
O&G worker brain  
Dome brain  
Queen brain

K Embryo  
L head  
O&G worker brain  
Dome brain  
Queen brain

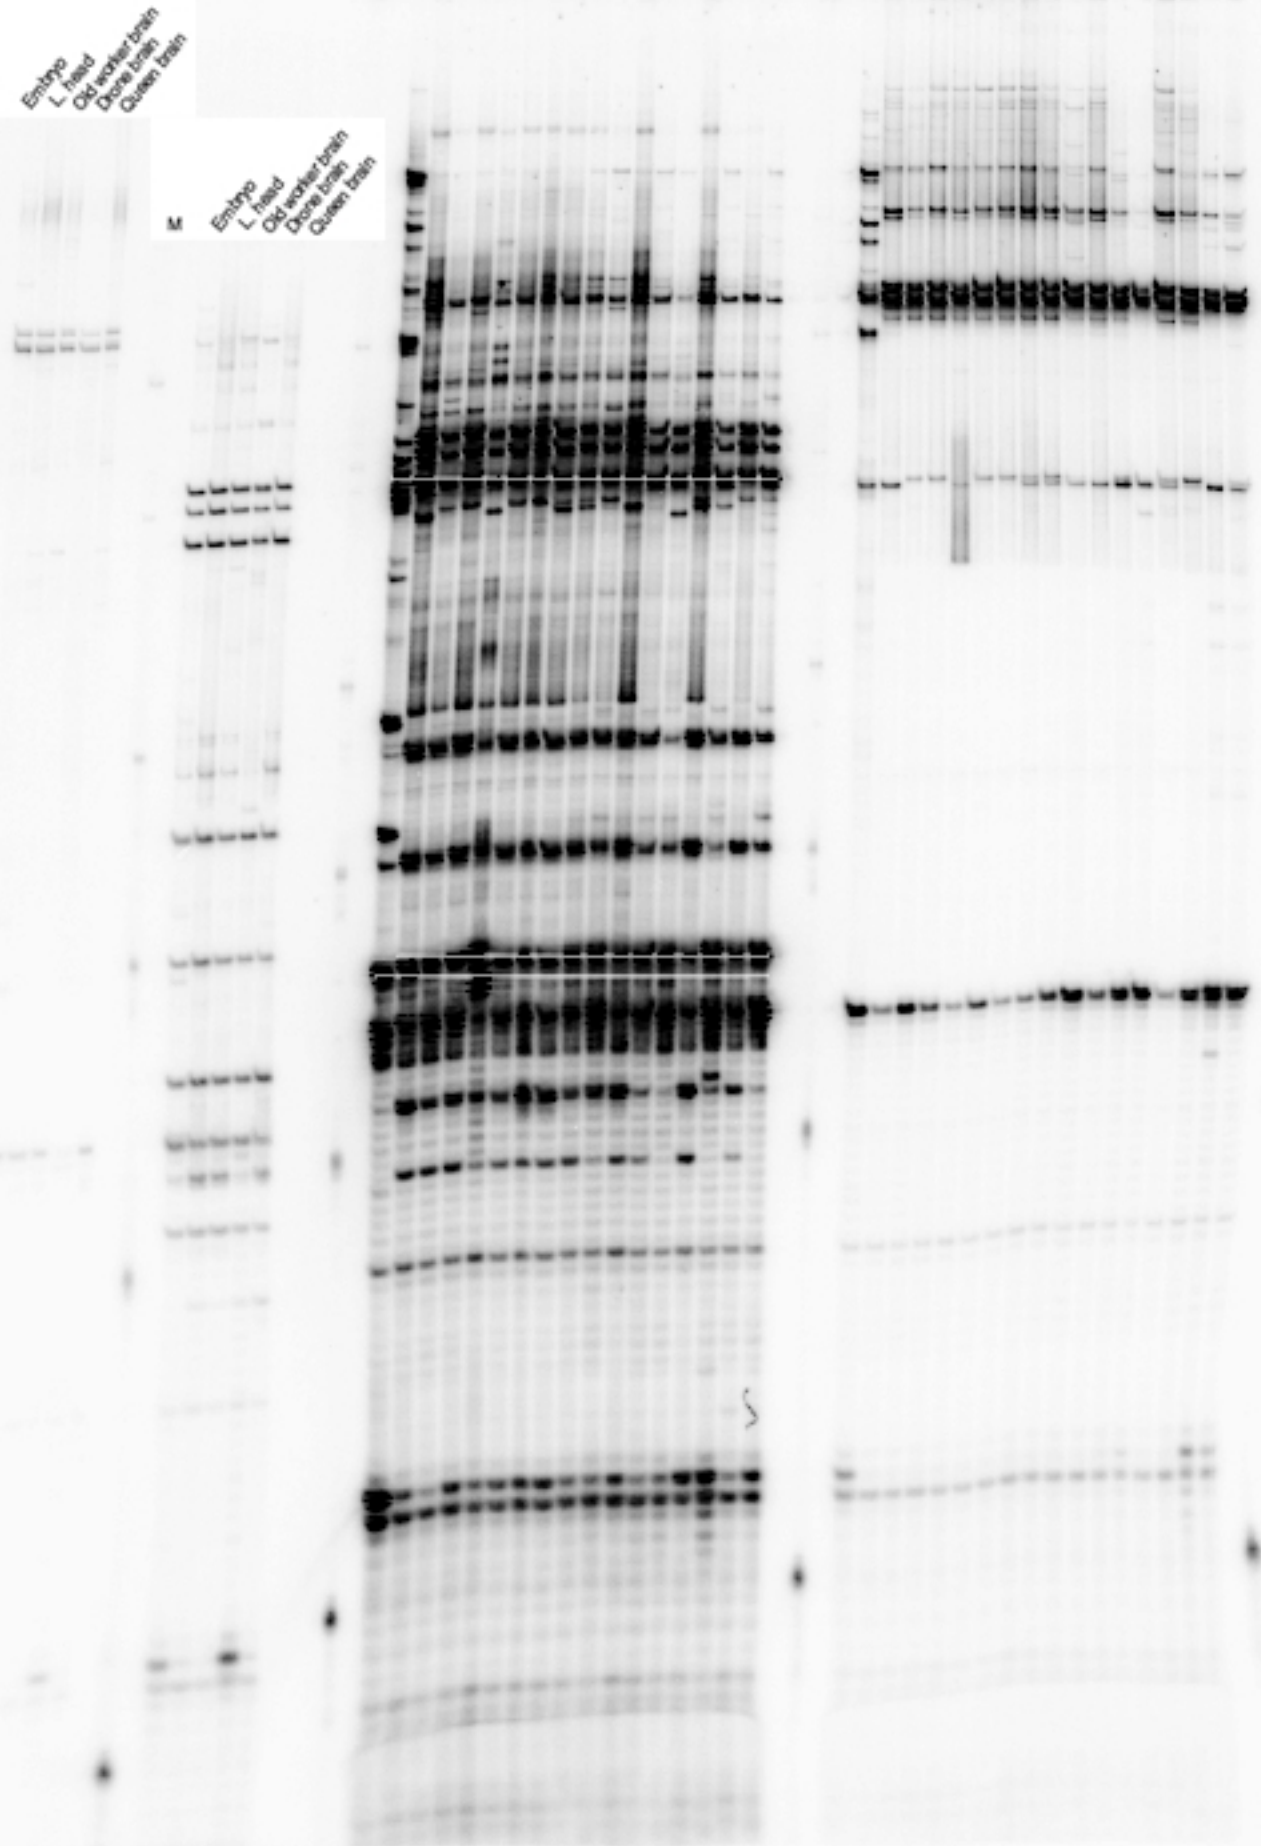

gel used for quantification in Fig 3

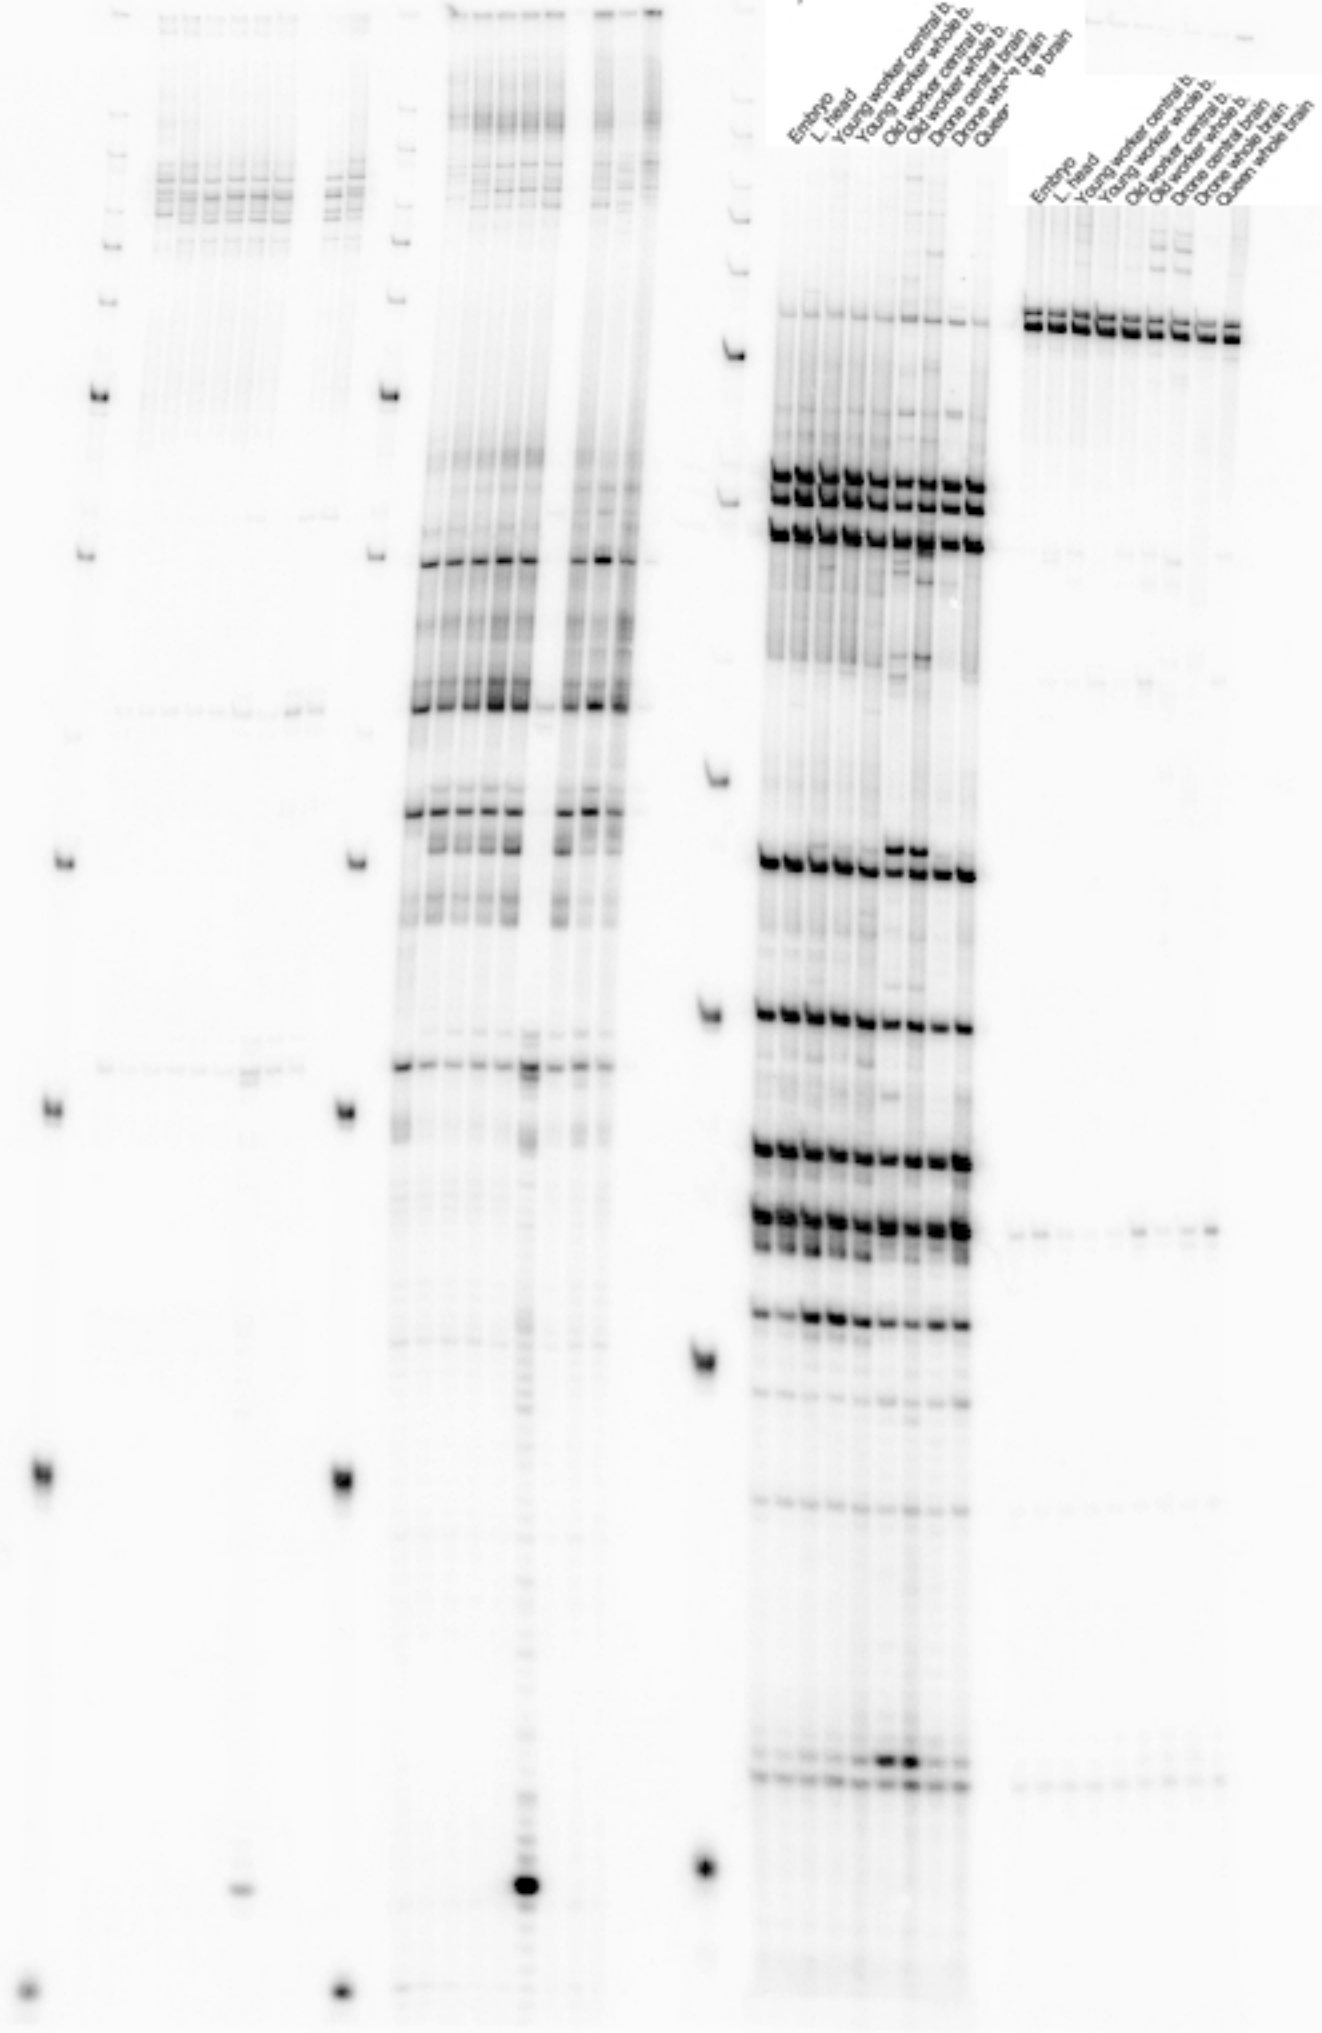

gel used for quantification in Fig 3

**Fig 4**

Ma      Control 1  
          Control 2  
          Control 3  
          Thiamethoxam  
          T + C + G

**undigested long run**

Ma      Control 1  
          Control 2  
          Control 3  
          Thiamethoxam  
          T + C + G

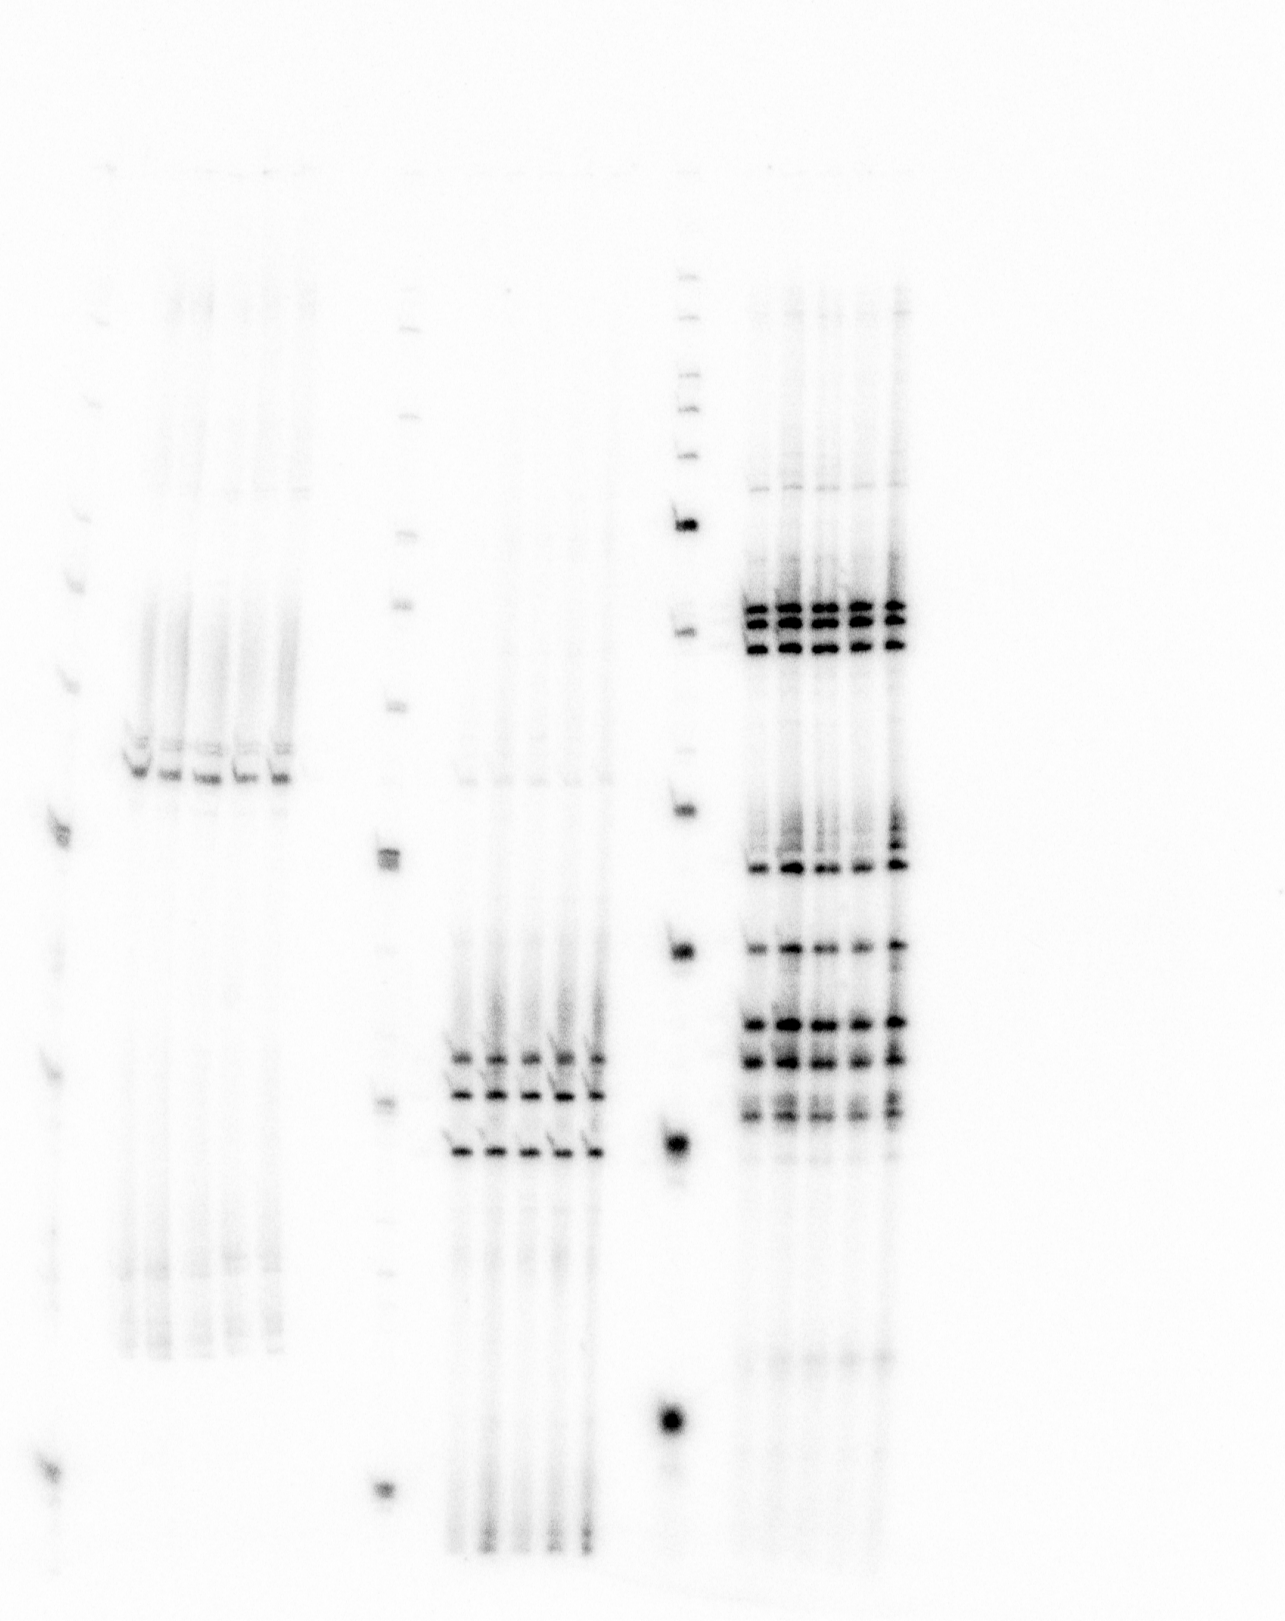



Fig 5

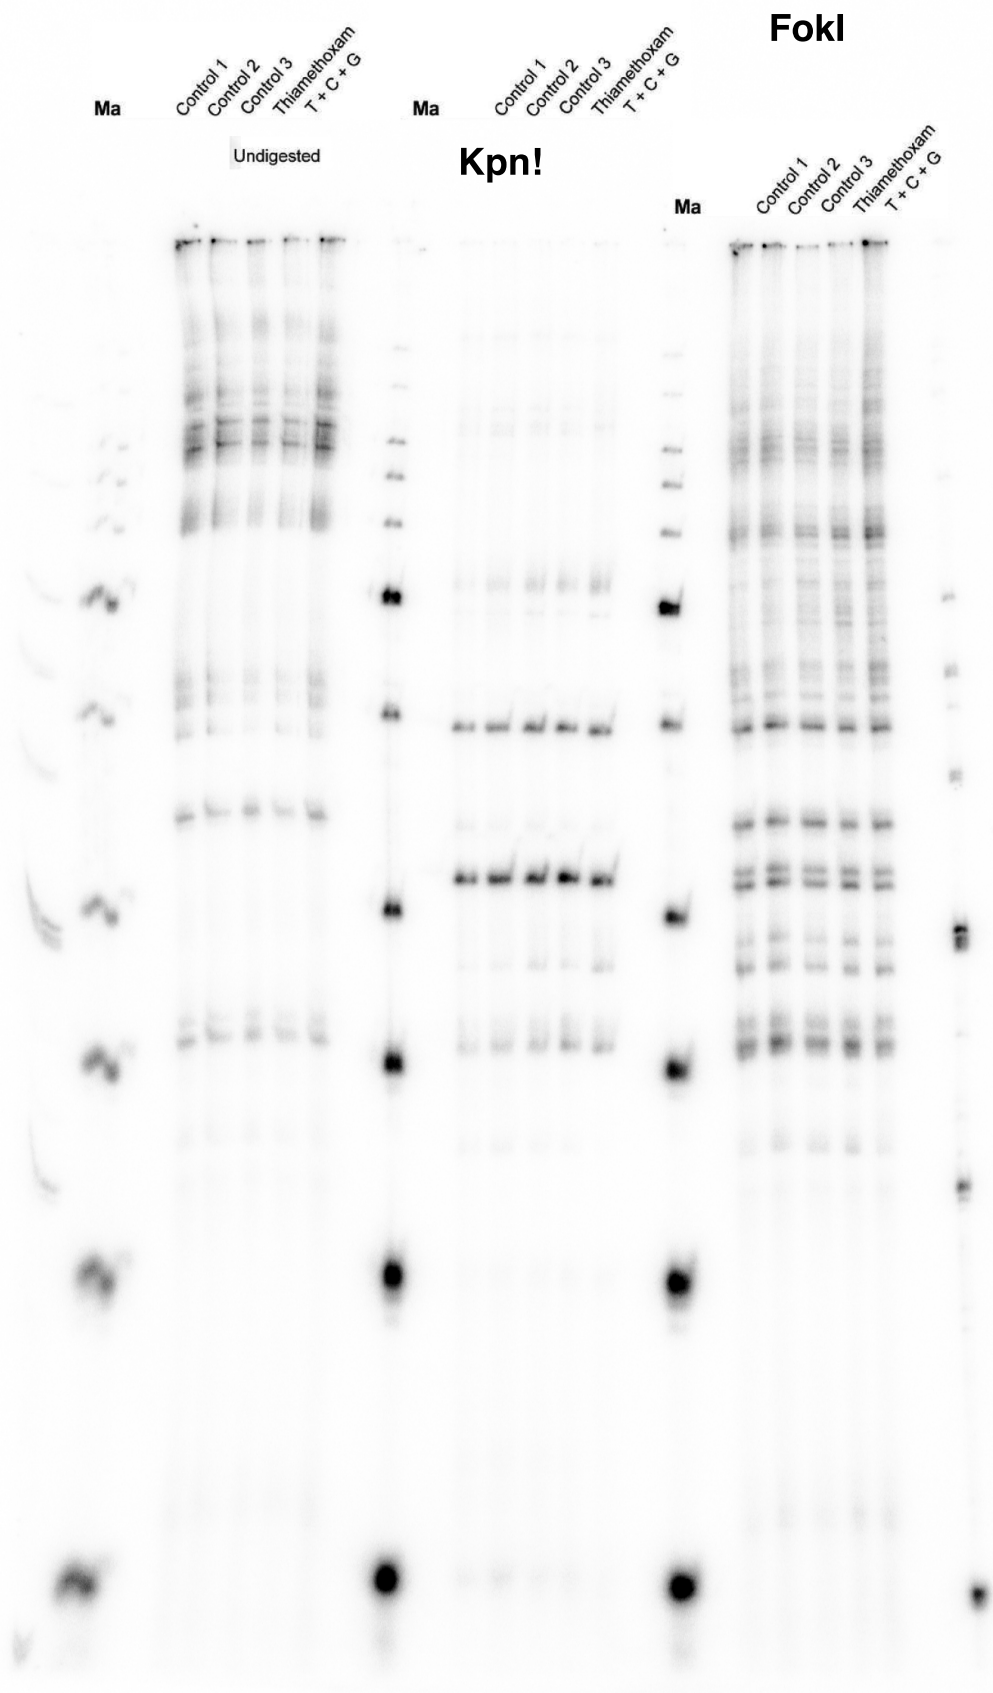

Supplemental Figure 2  
undigested

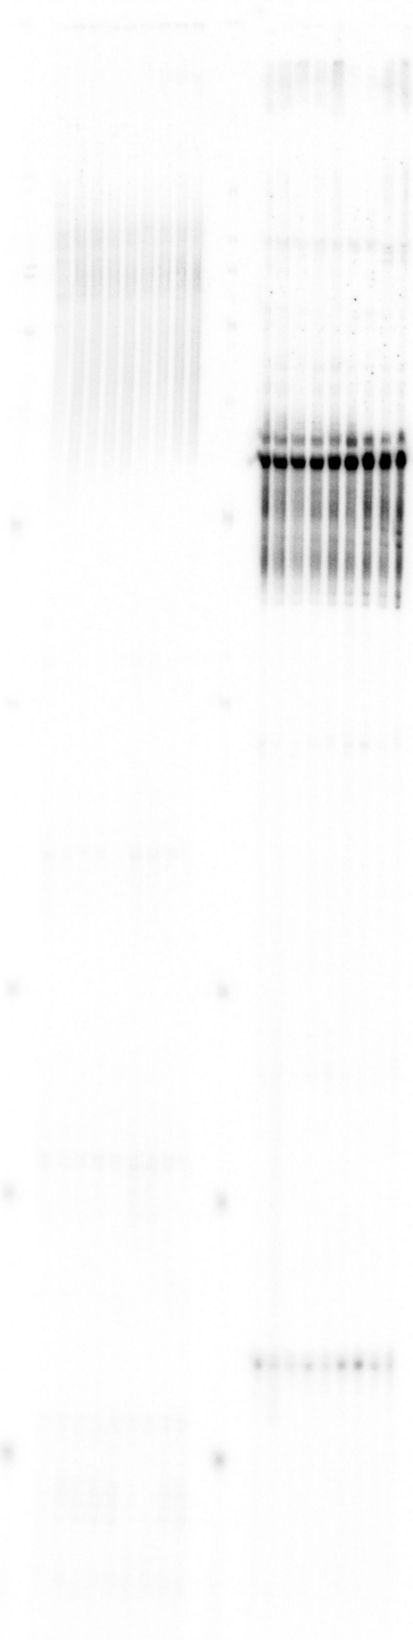

Supplemental Figure 2  
digested

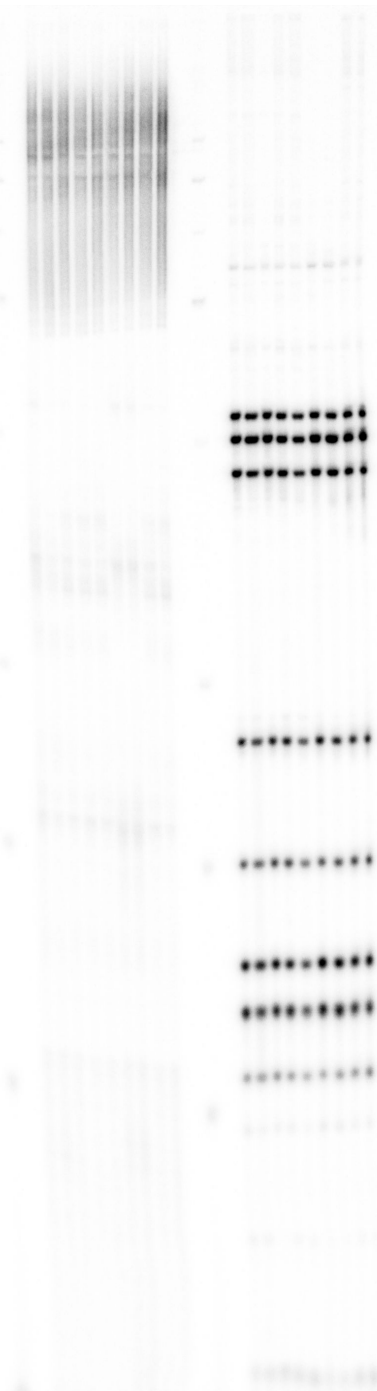

Supplement: 41598_2019_55534_MOESM1_ESM.pdf [file 41598_2019_55534_MOESM1_ESM.pdf]
